# Supplementary material for: Sex-differences in LPS-induced neonatal lung injury
Source: PubMed Central journal article supplement (PMC6560218; doi:10.1038/s41598-019-44955-0), 2019-06-11

## **Sex-differences in LPS-induced neonatal lung injury**

Leanna Nguyen, Odalis Castro, Robyn De Dios, Jeryl Sandoval, Sarah McKenna, Clyde J. Wright

TOP IMAGES in Figure 5 A, presented in the order of antibody exposure

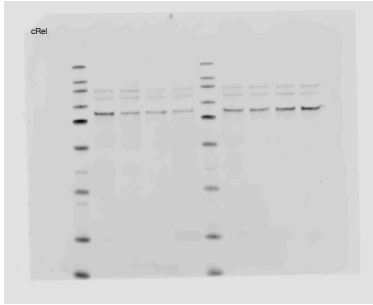

Middle IMAGES in Figure 5 A, presented in the order of antibody exposure

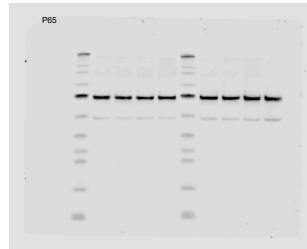

Bottom IMAGES in Figure 5 A, presented in the order of antibody exposure

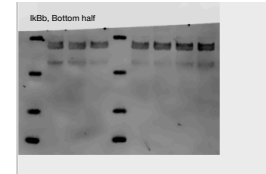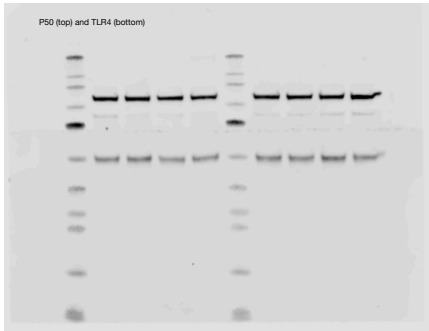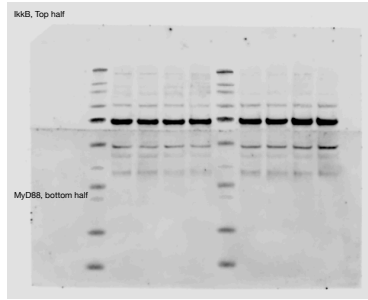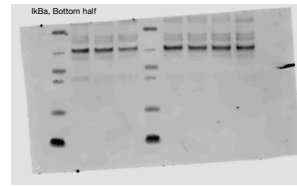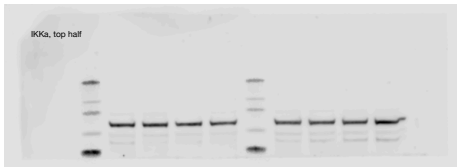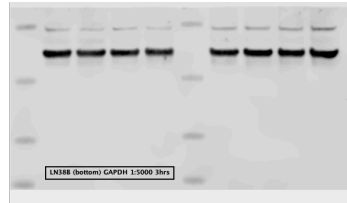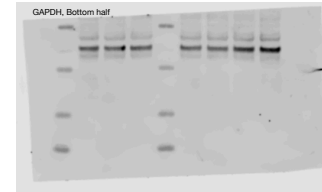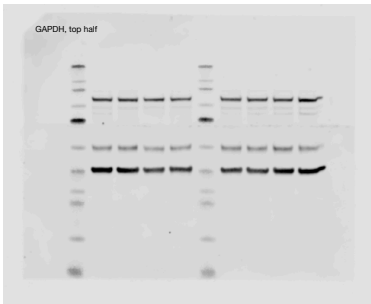

Figure 6A

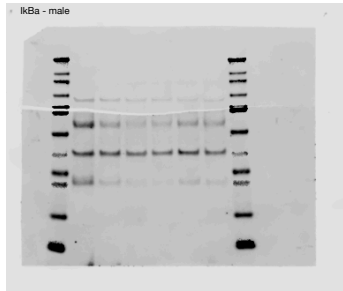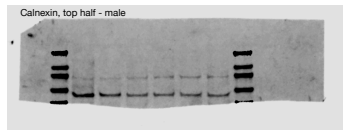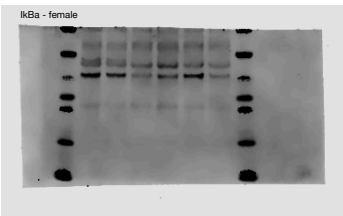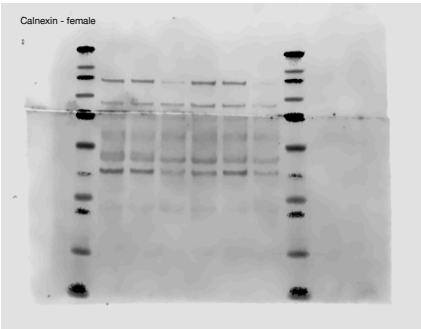

Figure 6B

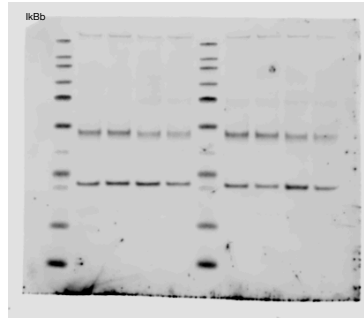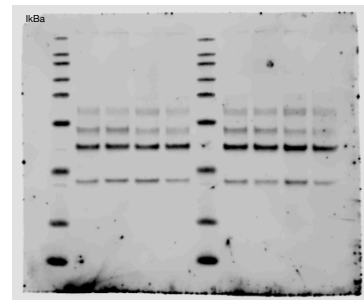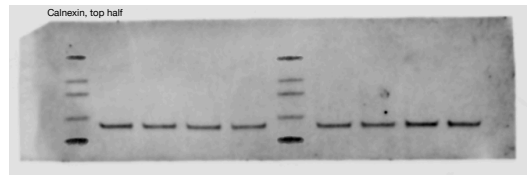

Figure 6C

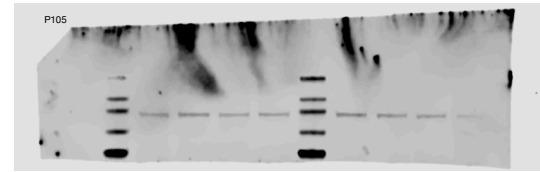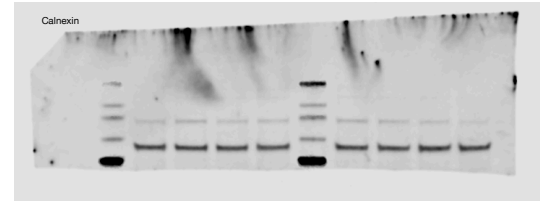

Figure 6d

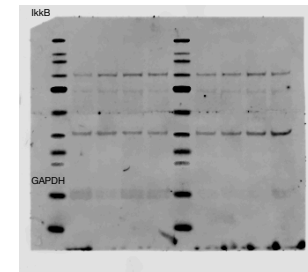

Figure 7A

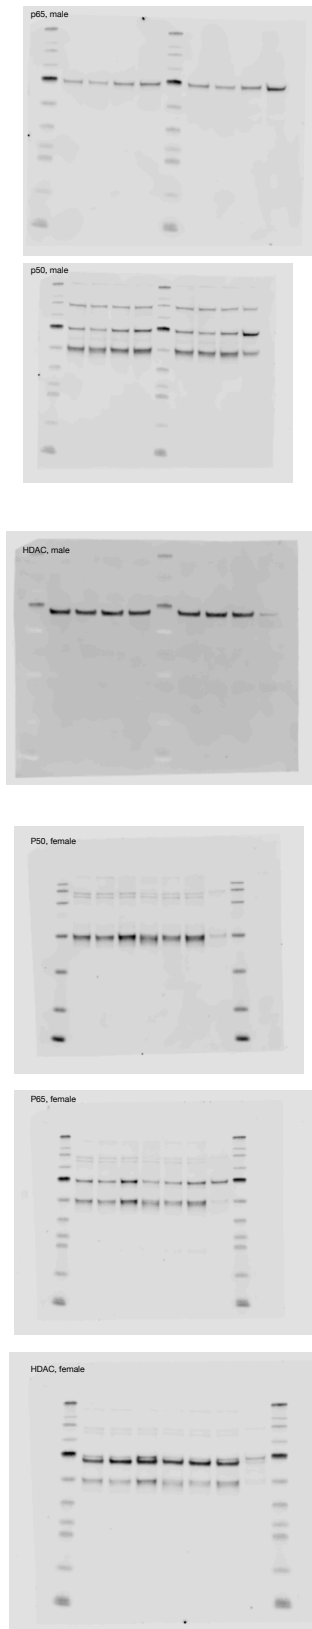

Figure 7B

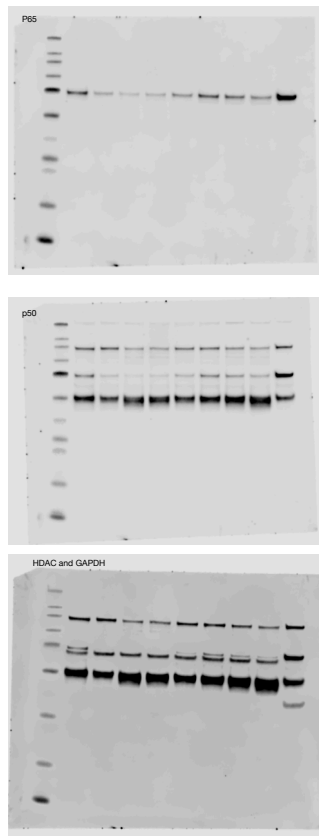

Supplement: 41598_2019_44955_MOESM1_ESM.pdf [file 41598_2019_44955_MOESM1_ESM.pdf]
